# Supplementary material for: Dolutegravir Restores Gut Microbiota in Late-stage HIV-1 Unlike Darunavir: An Open-Label, Randomized Clinical Trial
Source: Research Square preprint supplement (doi:10.21203/rs.3.rs-6782809/v1), 2025-07-21
Supplement: Supplementary file 4 [file d78c3b670881189581b01c6e.pdf]

Description of the 11 non-redundant graphlet orbits (O0–O11) used in graphlet correlation analysis.

| Orbit ID | Description                                     | Graphlet size | Topological role |
|----------|-------------------------------------------------|---------------|------------------|
| O0       | Node in a single edge (degree-1 endpoint)       | 2 nodes       | Terminal         |
| O1       | Node in a 3-node chain at one end               | 3 nodes       | Terminal         |
| O2       | Middle node of a 3-node chain                   | 3 nodes       | Chain            |
| O3       | Node forming a triangle (3-cycle)               | 3 nodes       | Cycle            |
| O4       | Endpoint in a 4-node path                       | 4 nodes       | Terminal         |
| O5       | Second node in a 4-node path                    | 4 nodes       | Chain            |
| O6       | Third node in a 4-node path                     | 4 nodes       | Chain            |
| O7       | Central node in a 3-star (hub with 3 leaves)    | 4 nodes       | Hub              |
| O8       | Leaf node in a 3-star                           | 4 nodes       | Terminal         |
| O9       | Node in a 4-node cycle (square)                 | 4 nodes       | Cycle            |
| O10      | Node in a 4-node clique (fully connected)       | 4 nodes       | Clique           |
| O11      | Node shared by two triangles (triangle overlap) | 4 nodes       | Cycle            |
