# Supplementary figures and images for: Dolutegravir Restores Gut Microbiota in Late-stage HIV-1 Unlike Darunavir: An Open-Label, Randomized Clinical Trial
Source: Research Square preprint supplement (doi:10.21203/rs.3.rs-6782809/v1), 2025-07-21

Supplementary Figure 1

A

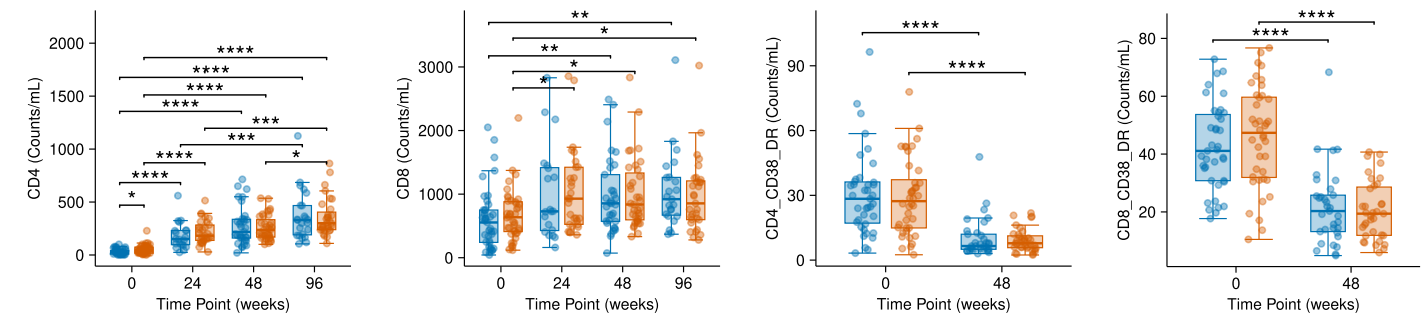

B

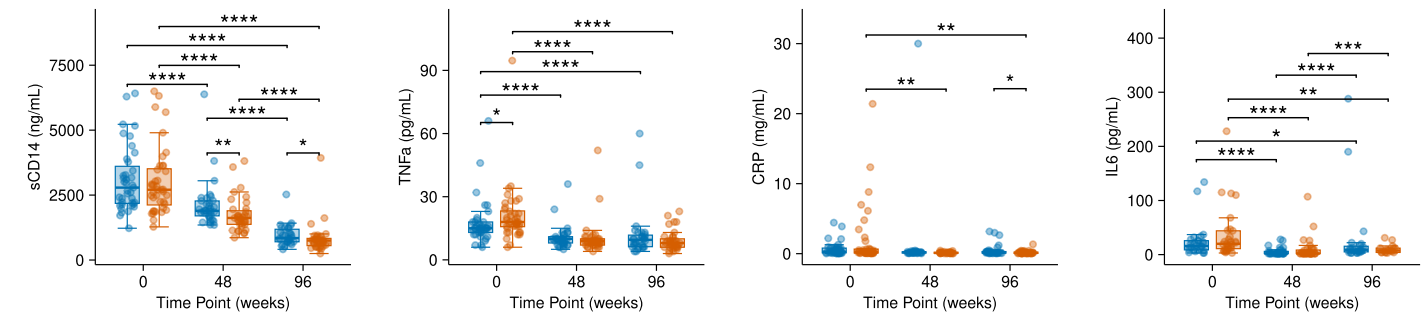

C

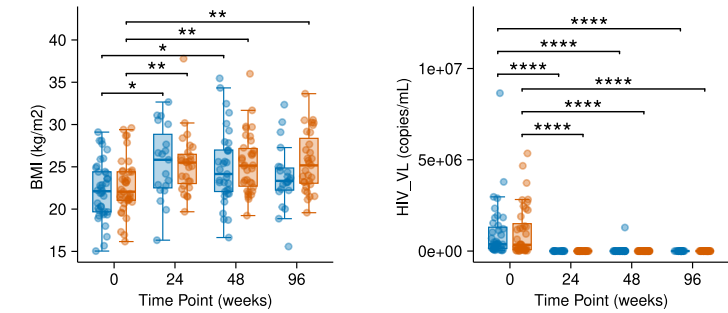

Supplement: Supplementary file 1 [file c34d90d34559e28a187f0c4b.pdf]

Supplementary Figure 4

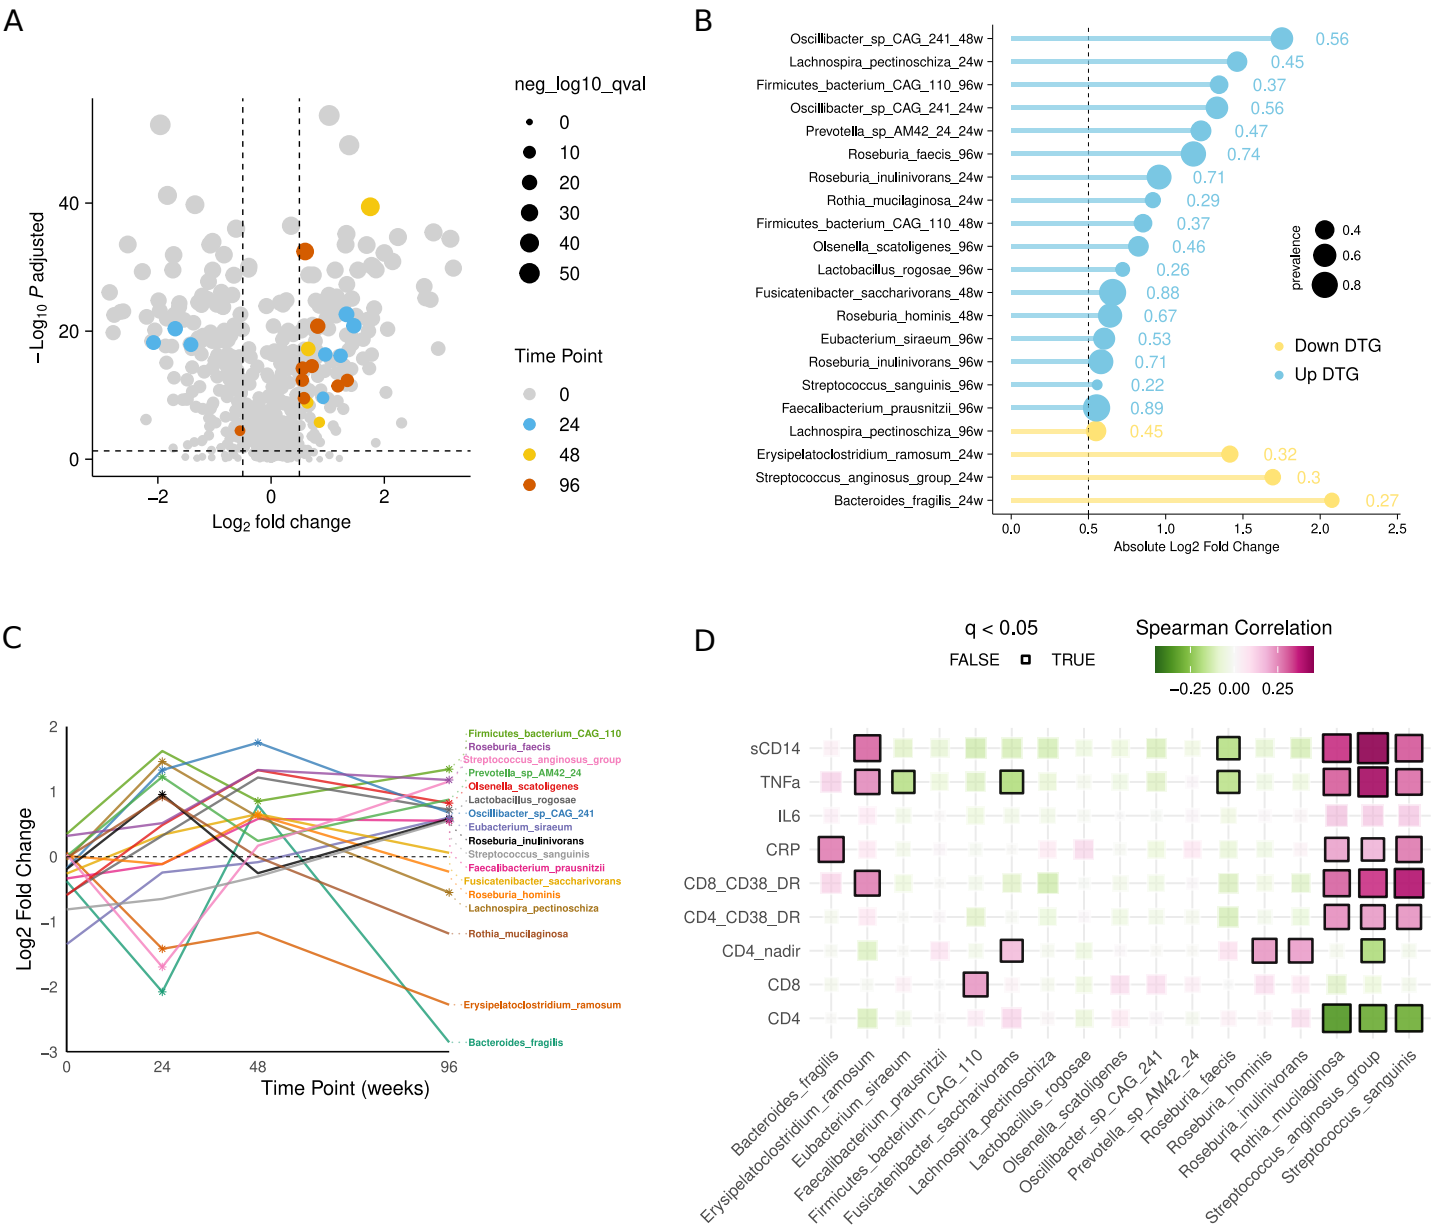

Supplement: Supplementary file 2 [file c845dfc0095950b11a6676a6.pdf]

Supplementary Figure 3

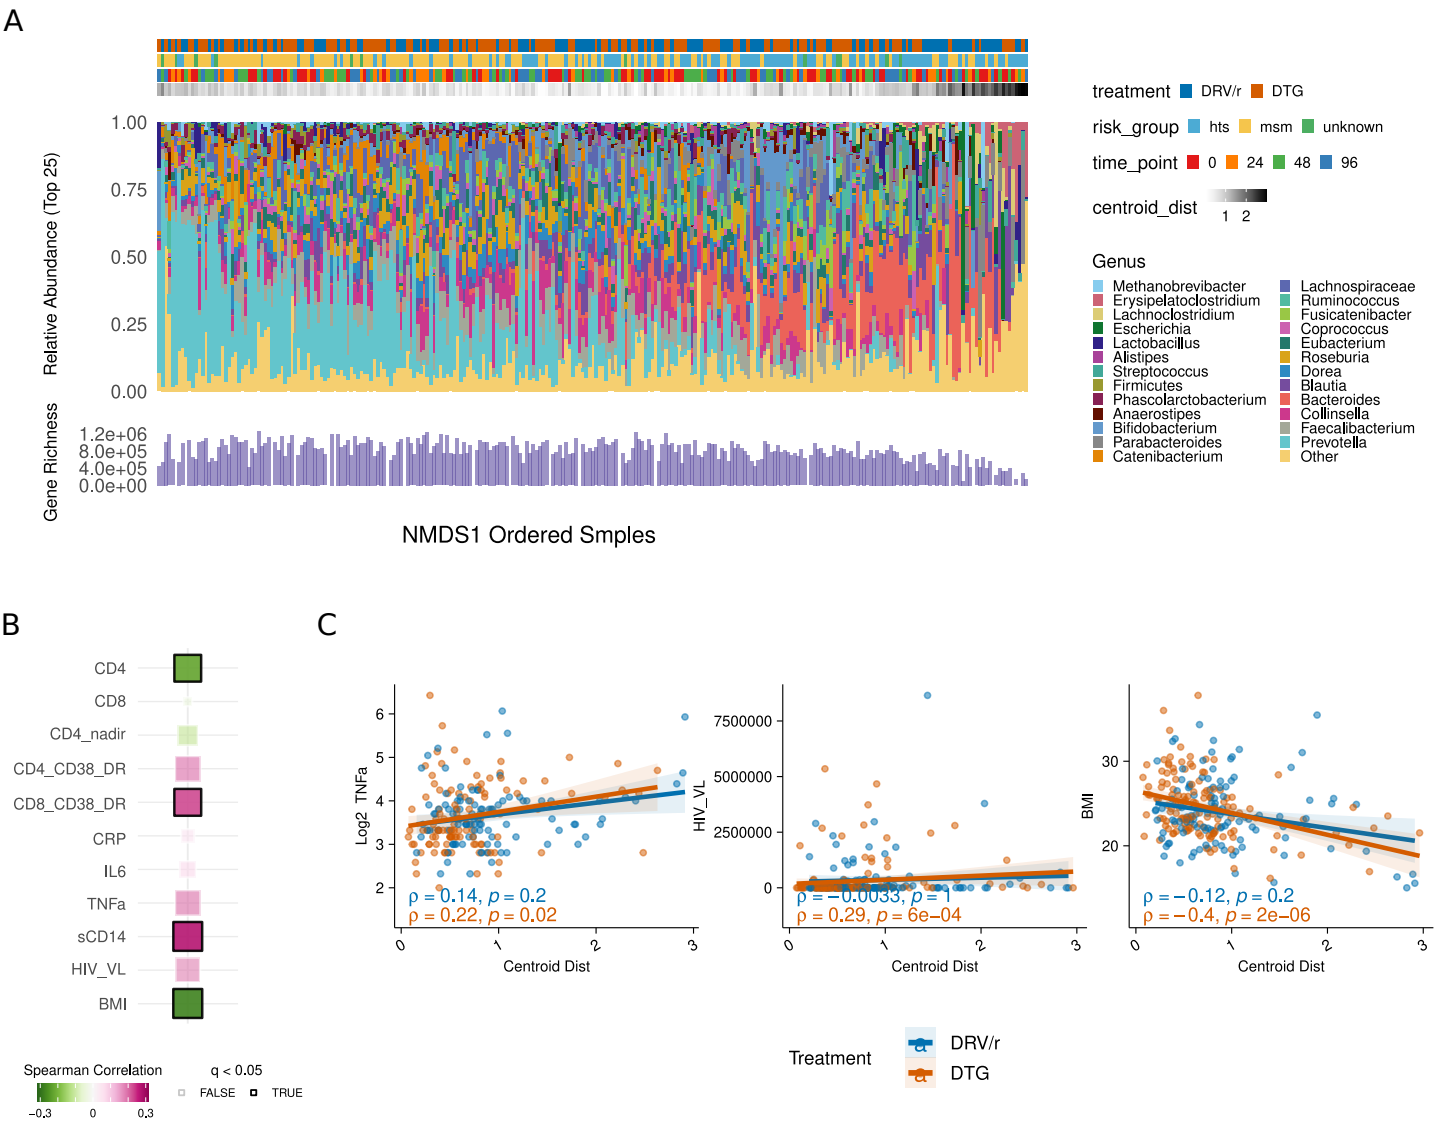

Supplement: Supplementary file 3 [file d6ebc479471b061df582f3a2.pdf]

## Supplementary Figure 5

A

B

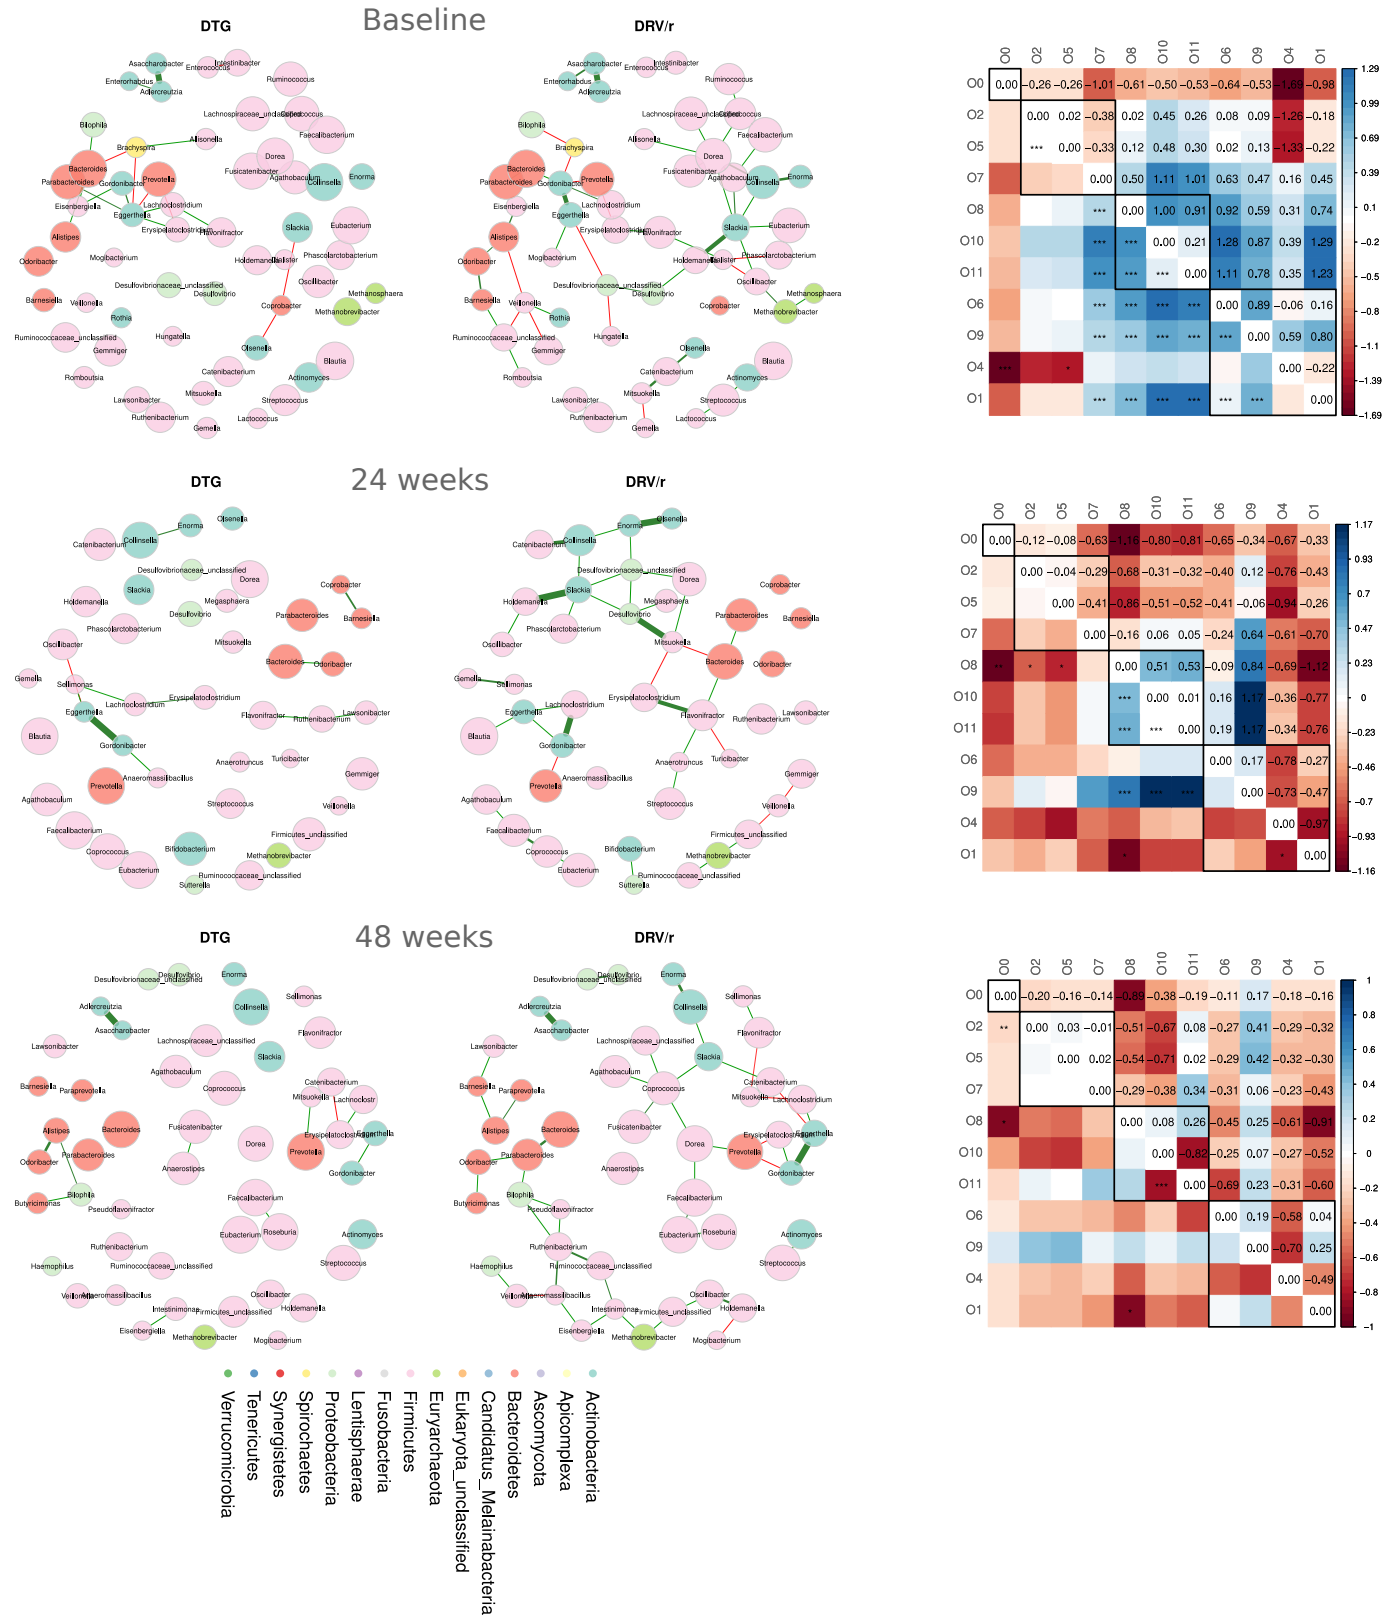

Supplement: Supplementary file 5 [file dd8f32808d41f9e23750bf0b.pdf]
